# Supplementary material
Source: PubMed Central journal article supplement (PMC7189293)
Supplement: advancesADV2019001156-suppl1.pdf [file advancesADV2019001156-suppl1.pdf]

**Supplemental Table 1.** Exons evaluated in the 28 genes sequencing by the bone marrow and ccfDNA assays

| <b>Gene</b>               | <b>Exon (codons) tested</b>                                                                                                                                                                                                                                                                                                                                                                                                                                                                                                                                                                                                                                                                                                                                                                                                                                                                                                                                                                                                                                                         |
|---------------------------|-------------------------------------------------------------------------------------------------------------------------------------------------------------------------------------------------------------------------------------------------------------------------------------------------------------------------------------------------------------------------------------------------------------------------------------------------------------------------------------------------------------------------------------------------------------------------------------------------------------------------------------------------------------------------------------------------------------------------------------------------------------------------------------------------------------------------------------------------------------------------------------------------------------------------------------------------------------------------------------------------------------------------------------------------------------------------------------|
| <i>ABL1</i> (NM_007313)   | 1-3 (1-99), 3-4 (92-200), 4-6 (195-317), 6-10 (307-523), 11 (560-576), 11 (567-606), 11 (598-638), 11 (661-700), 11 (691-731), 11 (723-762), 11 (752-790), 11 (781-820), 11 (810-851), 11 (843-882), 11 (873-912), 11 (935-975), 11 (965-1003), 11 (995-1034), 11 (1070-1131)                                                                                                                                                                                                                                                                                                                                                                                                                                                                                                                                                                                                                                                                                                                                                                                                       |
| <i>ASXL1</i> (NM_015338)  | 2-4 (20-104), 4-8 (96-253), 8-11 (250-377), 11 (368-407), 11 (398-437), 11-12 (427-589), 12 (581-619), 12 (640-678), 12 (670-709), 12 (701-740), 12 (732-771), 12 (762-801), 12 (792-831), 12 (821-860), 12 (851-889), 12 (880-919), 12 (911-949), 12 (940-979), 12 (970-1009), 12 (999-1038), 12 (1031-1069), 12 (1061-1100), 12 (1091-1129), 12 (1123-1160), 12 (1153-1191), 12 (1182-1221), 12 (1212-1251), 12 (1241-1281), 12 (1271-1311), 12 (1301-1341), 12 (1336-1375), 12 (1369-1542)                                                                                                                                                                                                                                                                                                                                                                                                                                                                                                                                                                                       |
| <i>BRAF</i> (NM_004333)   | 2-3 (47-157), 3-17 (147-709), 18 (729-767)                                                                                                                                                                                                                                                                                                                                                                                                                                                                                                                                                                                                                                                                                                                                                                                                                                                                                                                                                                                                                                          |
| <i>DNMT3A</i> (NM_022552) | 3-6 (25-196), 7-8 (214-322), 9-12 (339-486), 12 (477-492), 14-16 (519-641), 16-19 (631-739), 19 (729-768), 19-20 (759-803), 22-23 (827-913)                                                                                                                                                                                                                                                                                                                                                                                                                                                                                                                                                                                                                                                                                                                                                                                                                                                                                                                                         |
| <i>EGFR</i> (NM_005228)   | 2-3 (30-96), 3-6 (89-249), 7-9 (273-353), 9-12 (343-444), 12-28 (438-1104), 28 (1096-1133), 28 (1171-1211)                                                                                                                                                                                                                                                                                                                                                                                                                                                                                                                                                                                                                                                                                                                                                                                                                                                                                                                                                                          |
| <i>EZH2</i> (NM_004456)   | 2-10 (1-404), 10-11 (395-466), 11-15 (460-610), 15-19 (606-728), 19-20 (719-752)                                                                                                                                                                                                                                                                                                                                                                                                                                                                                                                                                                                                                                                                                                                                                                                                                                                                                                                                                                                                    |
| <i>FLT3</i> (NM_004119)   | 2-3 (15-112), 3-8 (103-311), 8 (301-340), 8-14 (331-610), 14-15 (606-642), 15-24 (635-994)                                                                                                                                                                                                                                                                                                                                                                                                                                                                                                                                                                                                                                                                                                                                                                                                                                                                                                                                                                                          |
| <i>GATA1</i> (NM_002049)  | 2 (1-16), 2-3 (13-89), 3 (81-120), 3 (111-151), 3 (142-182), 4 (200-248), 5-6 (265-306), 6 (297-336), 6 (377-414)                                                                                                                                                                                                                                                                                                                                                                                                                                                                                                                                                                                                                                                                                                                                                                                                                                                                                                                                                                   |
| <i>GATA2</i> (NM_032638)  | 2-3 (1-140), 3 (181-220), 3 (212-251), 3 (242-280), 3 (273-291), 4-6 (318-439), 6 (434-474), 6 (466-481)                                                                                                                                                                                                                                                                                                                                                                                                                                                                                                                                                                                                                                                                                                                                                                                                                                                                                                                                                                            |
| <i>HRAS</i> (NM_005343)   | 2-4 (18-129)                                                                                                                                                                                                                                                                                                                                                                                                                                                                                                                                                                                                                                                                                                                                                                                                                                                                                                                                                                                                                                                                        |
| <i>IDH1</i> (NM_005896)   | 3-4 (1-100), 4 (92-131), 4-6 (121-228), 6-10 (223-415)                                                                                                                                                                                                                                                                                                                                                                                                                                                                                                                                                                                                                                                                                                                                                                                                                                                                                                                                                                                                                              |
| <i>IDH2</i> (NM_002168)   | 1-2 (1-69), 3-5 (106-220), 5-7 (212-281), 7 (278-317), 7 (308-323), 9-10 (361-417), 10-11 (408-453)                                                                                                                                                                                                                                                                                                                                                                                                                                                                                                                                                                                                                                                                                                                                                                                                                                                                                                                                                                                 |
| <i>IKZF2</i> (NM_016260)  | 2-4 (1-99), 4 (91-129), 4-8 (121-432), 8 (424-463), 8 (454-494), 8 (484-524), 8 (514-527)                                                                                                                                                                                                                                                                                                                                                                                                                                                                                                                                                                                                                                                                                                                                                                                                                                                                                                                                                                                           |
| <i>JAK2</i> (NM_004972)   | 3-7 (11-220), 7-9 (241-364), 9-11 (359-456), 11-17 (451-723), 17-21 (747-949), 21-25 (939-1133)                                                                                                                                                                                                                                                                                                                                                                                                                                                                                                                                                                                                                                                                                                                                                                                                                                                                                                                                                                                     |
| <i>KIT</i> (NM_000222)    | 1-3 (1-128), 3 (119-157), 3-5 (152-292), 5 (253-254), 5-6 (292-321), 6-9 (318-460), 9-10 (454-532), 10-12 (523-606), 12-16 (597-765), 17-18 (788-842), 18-21 (834-977)                                                                                                                                                                                                                                                                                                                                                                                                                                                                                                                                                                                                                                                                                                                                                                                                                                                                                                              |
| <i>KRAS</i> (NM_004985)   | 2-3 (1-87), 3-5 (81-189)                                                                                                                                                                                                                                                                                                                                                                                                                                                                                                                                                                                                                                                                                                                                                                                                                                                                                                                                                                                                                                                            |
| <i>MDM2</i> (NM_002392)   | 1-6 (1-134), 7-11 (143-323), 11 (313-352), 11 (342-379), 11 (370-408), 11 (403-498)                                                                                                                                                                                                                                                                                                                                                                                                                                                                                                                                                                                                                                                                                                                                                                                                                                                                                                                                                                                                 |
| <i>MLL</i> (NM_005933)    | 2-3 (145-182), 3 (178-215), 3 (206-244), 3 (236-274), 3 (265-303), 3 (293-332), 3 (325-362), 3 (353-392), 3 (390-427), 3 (418-456), 3 (476-515), 3 (506-544), 3 (534-573), 3 (564-603), 3 (594-632), 3 (624-662), 3 (653-691), 3 (682-722), 3 (714-753), 3 (743-780), 3 (771-809), 3 (799-837), 3-5 (831-1129), 5-6 (1121-1212), 7-12 (1218-1507), 13-15 (1526-1617), 15-19 (1610-1805), 19-22(1796-1943), 22 (1940-1979), 23 (1985-2024), 24-26 (2032-2114), 26-27 (2111-2186), 27 (2176-2214), 27 (2204-2244), 27 (2236-2274), 27 (2264-2303), 27 (2295-2334), 27 (2324-2362), 27 (2354-2392), 27 (2382-2422), 27 (2413-2451), 27 (2443-2480), 27(2471-2511), 27 (2502-2542), 27 (2533-2570), 27 (2561-2600), 27 (2591-2629), 27 (2619-2660), 27 (2651-2690), 27 (2710-2747),27 (2798-2836), 27 (2827-2864), 27 (2856-2894), 27 (2885-2924), 27 (2914-2953), 27 (2946-2983), 27 (2974-3012), 27 (3003-3041), 27 (3032-3072), 27 (3063-3102), 27 (3092-3131), 27 (3123-3161), 27 (3152-3190), 27-32 (3183-3729), 32 (3720-3758), 32-36 (3755-3891), 36 (3882-3921), 36 (3918-3970) |

|                            |                                                                                                                                                                                                                                                                                                                                                                                                                                                                                                                                                                                                                                                                        |
|----------------------------|------------------------------------------------------------------------------------------------------------------------------------------------------------------------------------------------------------------------------------------------------------------------------------------------------------------------------------------------------------------------------------------------------------------------------------------------------------------------------------------------------------------------------------------------------------------------------------------------------------------------------------------------------------------------|
| <i>MPL</i> (NM_005373)     | 1 (1-17), 1-3 (7-88), 3 (81-122), 4-7 (146-346), 7 (336-375), 7-9 (370-490), 11 (522-551), 12 (559-636)                                                                                                                                                                                                                                                                                                                                                                                                                                                                                                                                                                |
| <i>MYD88</i> (NM_002468)   | 1 (1-20), 1 (10-50), 1-3 (41-184), 3 (174-213), 3-5 (211-310)                                                                                                                                                                                                                                                                                                                                                                                                                                                                                                                                                                                                          |
| <i>NOTCH1</i> (NM_017617)  | 1-3 (1-128), 4 (197-237), 5 (248-289), 6 (318-357), 6 (350-367), 8 (419-443), 8 (434-475), 8-9 (466-504), 10 (519-557), 11-12(632-672), 13-14 (716-785), 16-17 (823-885), 18 (914-981), 21 (1109-1166), 21 (1157-1170), 23 (1215-1294), 24 (1335-1338), 25(1373-1413), 25 (1449-1491), 25 (1481-1523), 25-26 (1513-1631), 26 (1625-1666), 26 (1657-1673), 27 (1701-1723), 29 (1795-1804), 30 (1825-1843), 30 (1835-1874), 30 (1865-1880), 31 (1895-1935), 31 (1933-1973), 31 (1965-1978), 32 (2012-2028), 34(2061-2085), 34 (2131-2210), 34 (2251-2335), 34 (2326-2364), 34 (2356-2398), 34 (2420-2460), 34 (2451-2489), 34 (2481-2521),34 (2511-2549), 34 (2540-2556) |
| <i>NPM1</i> (NM_002520)    | 1-5 (1-131), 5-11 (123-295)                                                                                                                                                                                                                                                                                                                                                                                                                                                                                                                                                                                                                                            |
| <i>NRAS</i> (NM_002524)    | 2 (1-37), 3-5 (77-190)                                                                                                                                                                                                                                                                                                                                                                                                                                                                                                                                                                                                                                                 |
| <i>PTPN11</i> (NM_002834)  | 2-3 (5-60), 3-8 (54-299), 9-15 (312-594)                                                                                                                                                                                                                                                                                                                                                                                                                                                                                                                                                                                                                               |
| <i>RUNX1</i> (NM_001754)   | 3-4 (20-101), 5-6 (118-205), 8-9 (269-435), 9 (428-465), 9 (460-481)                                                                                                                                                                                                                                                                                                                                                                                                                                                                                                                                                                                                   |
| <i>TET2</i> (NM_001127208) | 3 (1-22), 3 (13-52), 3 (44-82), 3 (73-112), 3 (103-140), 3 (132-171), 3 (162-200), 3 (191-229), 3 (220-259), 3 (250-288), 3 (279-318), 3 (308-347), 3 (337-376), 3 (369-408), 3 (399-439), 3 (429-468), 3 (459-498), 3 (488-527), 3 (518-557), 3 (549-586), 3 (577-616), 3 (636-674), 3 (665-704), 3 (694-732), 3 (723-762), 3 (752-790), 3-6 (783-1216), 6-10 (1207-1408), 10 (1399-1438), 10-11(1432-1533), 11 (1523-1563), 11 (1555-1593), 11 (1585-1622), 11 (1612-1651), 11 (1643-1683), 11 (1674-1712), 11 (1703-1740),11 (1736-2003)                                                                                                                            |
| <i>TP53</i> (NM_000546)    | 4 (41-80), 4 (72-112), 4-6 (107-214), 6 (210-224), 7-10 (234-367)                                                                                                                                                                                                                                                                                                                                                                                                                                                                                                                                                                                                      |
| <i>WT1</i> (NM_024426)     | 1 (25-63), 1 (126-204), 1 (197-216), 2 (240-257), 4-10 (291-518)                                                                                                                                                                                                                                                                                                                                                                                                                                                                                                                                                                                                       |

**Supplemental Table 2.** 275 genes evaluated in the ccfDNA targeted sequencing panel

|               |               |               |                |                |                 |                |               |                |                |                 |
|---------------|---------------|---------------|----------------|----------------|-----------------|----------------|---------------|----------------|----------------|-----------------|
| <i>ABL1</i>   | <i>BCL2L1</i> | <i>CDK12</i>  | <i>DOT1L</i>   | <i>FBXW7</i>   | <i>HIST1H3B</i> | <i>KMT2C</i>   | <i>MYC</i>    | <i>PIK3CA</i>  | <i>RHEB</i>    | <i>STK11</i>    |
| <i>ACVR1B</i> | <i>BCL6</i>   | <i>CDK4</i>   | <i>EED</i>     | <i>FGF4</i>    | <i>HNF1A</i>    | <i>KMT2D</i>   | <i>MYCL</i>   | <i>PIK3R1</i>  | <i>RHOA</i>    | <i>SUFU</i>     |
| <i>AKT1</i>   | <i>BCOR</i>   | <i>CDK6</i>   | <i>EGFR</i>    | <i>FGF6</i>    | <i>HOXB13</i>   | <i>KRAS</i>    | <i>MYCN</i>   | <i>PIK3R2</i>  | <i>RIT1</i>    | <i>SUZ12</i>    |
| <i>AKT2</i>   | <i>BCORL1</i> | <i>CDKN2A</i> | <i>EGLN1</i>   | <i>FGFR1</i>   | <i>HRAS</i>     | <i>LRP1B</i>   | <i>MYD88</i>  | <i>PIM1</i>    | <i>RNF43</i>   | <i>TAL1</i>     |
| <i>AKT3</i>   | <i>BCR</i>    | <i>CDKN2B</i> | <i>EP300</i>   | <i>FGFR2</i>   | <i>HSP90AA1</i> | <i>MAP2K1</i>  | <i>NF1</i>    | <i>PLCG1</i>   | <i>ROS1</i>    | <i>TCF3</i>     |
| <i>ALK</i>    | <i>BIRC3</i>  | <i>CDKN2C</i> | <i>EPAS1</i>   | <i>FGFR3</i>   | <i>ID3</i>      | <i>MAP2K2</i>  | <i>NF2</i>    | <i>PMS1</i>    | <i>RUNX1</i>   | <i>TERT</i>     |
| <i>AMER1</i>  | <i>BLM</i>    | <i>CEBPA</i>  | <i>EPHA3</i>   | <i>FGFR4</i>   | <i>IDH1</i>     | <i>MAP2K4</i>  | <i>NFE2L2</i> | <i>PMS2</i>    | <i>SDHB</i>    | <i>TET2</i>     |
| <i>APC</i>    | <i>BRAF</i>   | <i>CHEK1</i>  | <i>EPHA5</i>   | <i>FH</i>      | <i>IDH2</i>     | <i>MAP3K1</i>  | <i>NFKBIA</i> | <i>POLD1</i>   | <i>SETBP1</i>  | <i>TGFBR2</i>   |
| <i>AR</i>     | <i>BRCA1</i>  | <i>CHEK2</i>  | <i>ERBB2</i>   | <i>FLCN</i>    | <i>IGF1R</i>    | <i>MAP3K14</i> | <i>NKX2-1</i> | <i>POLE</i>    | <i>SETD2</i>   | <i>TNFAIP3</i>  |
| <i>ARAF</i>   | <i>BRCA2</i>  | <i>CIC</i>    | <i>ERBB3</i>   | <i>FLT3</i>    | <i>IKZF1</i>    | <i>MAPK1</i>   | <i>NOTCH1</i> | <i>PPM1D</i>   | <i>SF3B1</i>   | <i>TNFRSF14</i> |
| <i>ARID1A</i> | <i>BRIP1</i>  | <i>CREBBP</i> | <i>ERBB4</i>   | <i>FLT4</i>    | <i>IKZF3</i>    | <i>MCL1</i>    | <i>NOTCH2</i> | <i>PPP2R1A</i> | <i>SMAD2</i>   | <i>TP53</i>     |
| <i>ARID1B</i> | <i>BTK</i>    | <i>CRLF2</i>  | <i>ERG</i>     | <i>FOXL2</i>   | <i>IL7R</i>     | <i>MDM2</i>    | <i>NOTCH3</i> | <i>PRDM1</i>   | <i>SMAD4</i>   | <i>TRAF3</i>    |
| <i>ARID2</i>  | <i>CALR</i>   | <i>CSF1R</i>  | <i>ESR1</i>    | <i>FUBP1</i>   | <i>INHBA</i>    | <i>MDM4</i>    | <i>NPM1</i>   | <i>PRKAR1A</i> | <i>SMARCA4</i> | <i>TSC1</i>     |
| <i>ASXL1</i>  | <i>CARD11</i> | <i>CSF3R</i>  | <i>ETV6</i>    | <i>GALNT12</i> | <i>IRF4</i>     | <i>MED12</i>   | <i>NRAS</i>   | <i>PRKDC</i>   | <i>SMARCB1</i> | <i>TSC2</i>     |
| <i>ATM</i>    | <i>CBL</i>    | <i>CTCF</i>   | <i>EXO1</i>    | <i>GATA1</i>   | <i>JAK1</i>     | <i>MEF2B</i>   | <i>NSD1</i>   | <i>PRSS1</i>   | <i>SMC1A</i>   | <i>TSHR</i>     |
| <i>ATR</i>    | <i>CBLB</i>   | <i>CTNNA1</i> | <i>EZH2</i>    | <i>GATA2</i>   | <i>JAK2</i>     | <i>MEN1</i>    | <i>NTRK1</i>  | <i>PTCH1</i>   | <i>SMC3</i>    | <i>U2AF1</i>    |
| <i>ATRX</i>   | <i>CBLC</i>   | <i>CTNNB1</i> | <i>FAM175A</i> | <i>GATA3</i>   | <i>JAK3</i>     | <i>MET</i>     | <i>NTRK2</i>  | <i>PTEN</i>    | <i>SMO</i>     | <i>U2AF2</i>    |
| <i>AURKA</i>  | <i>CCND1</i>  | <i>CUX1</i>   | <i>FAM46C</i>  | <i>GEN1</i>    | <i>KAT6A</i>    | <i>MITF</i>    | <i>NTRK3</i>  | <i>PTPN11</i>  | <i>SOCS1</i>   | <i>VHL</i>      |
| <i>AURKB</i>  | <i>CCND3</i>  | <i>CXCR4</i>  | <i>FANCA</i>   | <i>GNA11</i>   | <i>KDM5C</i>    | <i>MLH1</i>    | <i>PAK3</i>   | <i>RAC1</i>    | <i>SOX2</i>    | <i>WHSC1</i>    |
| <i>AURKC</i>  | <i>CCNE1</i>  | <i>CYLD</i>   | <i>FANCC</i>   | <i>GNAQ</i>    | <i>KDM6A</i>    | <i>MPL</i>     | <i>PALB2</i>  | <i>RAD21</i>   | <i>SOX9</i>    | <i>WT1</i>      |
| <i>AXIN1</i>  | <i>CD274</i>  | <i>DAXX</i>   | <i>FANCD2</i>  | <i>GNAS</i>    | <i>KDR</i>      | <i>MRE11A</i>  | <i>PAX5</i>   | <i>RAD50</i>   | <i>SPOP</i>    | <i>XPO1</i>     |
| <i>AXIN2</i>  | <i>CD79A</i>  | <i>DDR2</i>   | <i>FANCE</i>   | <i>GREM1</i>   | <i>KEAP1</i>    | <i>MSH2</i>    | <i>PBRM1</i>  | <i>RAD51</i>   | <i>SRC</i>     | <i>XRCC2</i>    |
| <i>B2M</i>    | <i>CD79B</i>  | <i>DICER1</i> | <i>FANCF</i>   | <i>GRIN2A</i>  | <i>KIT</i>      | <i>MSH6</i>    | <i>PDGFRA</i> | <i>RAF1</i>    | <i>SRSF2</i>   | <i>XRCC3</i>    |
| <i>BAP1</i>   | <i>CDC73</i>  | <i>DNM2</i>   | <i>FANCG</i>   | <i>H3F3A</i>   | <i>KMT2A</i>    | <i>MTOR</i>    | <i>PDGFRB</i> | <i>RB1</i>     | <i>STAG2</i>   | <i>ZNF217</i>   |
| <i>BCL2</i>   | <i>CDH1</i>   | <i>DNMT3A</i> | <i>FAS</i>     | <i>HGF</i>     | <i>KMT2B</i>    | <i>MUTYH</i>   | <i>PHF6</i>   | <i>RET</i>     | <i>STAT3</i>   | <i>ZRSR2</i>    |

**Supplemental Table 3.** Mutation VAF in DNA extracted from bone marrow cells and from ccfDNA from one patient tested on 3 consecutive days. Overall similar results were noted between across time and between the two sources.

| Gene  | HGVSc                  | HGVSp      | Sample type | Day 1 | Day 2 | Day3  |
|-------|------------------------|------------|-------------|-------|-------|-------|
|       |                        |            |             | VAf%  | VAf%  | VAf%  |
| ASXL1 | NM_015338.5:c.2920dupT | p.Tyr974fs | BM Cells    | 3.11  | 5.19  | 5.16  |
|       |                        |            | ccfDNA      | 7.79  | 5.84  | 6.46  |
| U2AF1 | NM_006758.2:c.101C>A   | p.Ser34Tyr | BM Cells    | 20.31 | 17.89 | 16.67 |
|       |                        |            | ccfDNA      | 12.5  | 26.06 | 17.54 |

**Supplemental Table 4.** Mutations and variant allelic frequencies detected in ccfDNA and/or bone marrow in the entire cohort

| UPN* | ccfDNA mutation                                                      | VAF (%) | Bone marrow mutation                            | VAF (%) |
|------|----------------------------------------------------------------------|---------|-------------------------------------------------|---------|
| 1    | ASXL1 NM_015338.5:c.1900_1922delAGAGAGG<br>CGGCCACCACTGCCAT p.Glu635 | 25.5    | –                                               | –       |
|      | RUNX1 NM_001754.4:c.1155C>A p.Tyr385Ter                              | 48.7    | RUNX1 NM_001754.4:c.1155C>A p.Tyr385Ter         | 58.09   |
|      | RUNX1 NM_001754.4:c.319C>T p.Arg107Cys                               | 42.8    | RUNX1 NM_001754.4:c.319C>T p.Arg107Cys          | 27.2    |
| 2    | TET2 NM_001127208.2:c.4138C>T p.His1380Tyr                           | 48.7    | TET2 NM_001127208.2:c.4138C>T p.His1380Tyr      | 22.15   |
|      | TP53 NM_000546.5:c.800G>A p.Arg267Gln                                | 42.9    | TP53 NM_000546.5:c.800G>A p.Arg267Gln           | 59.19   |
|      | TP53 NM_000546.5:c.467G>A p.Arg156His                                | 90.8    | TP53 NM_000546.5:c.467G>A p.Arg156His           | 54.93   |
| 3    | KRAS NM_033360.2:c.183A>C p.Gln61His                                 | 36.7    | KRAS NM_004985.3:c.183A>C p.Gln61His            | 30.37   |
| 5    | KIT NM_000222.2:c.1254C>A p.Tyr418Ter                                | 7.7     | KIT NM_000222.2:c.1254C>A p.Tyr418Ter           | 5.1     |
|      | –                                                                    | –       | FLT3 NM_004119.2:c.1352C>T p.Ser451Phe          | 5.87    |
| 7    | ASXL1 NM_015338.5:c.1934dupG p.Gly646fs                              | 25.2    | ASXL1 NM_015338.5:c.1934dupG p.Gly646fs         | 38.0    |
|      | RUNX1 NM_001754.4:c.601C>T p.Arg201Ter                               | 43.2    | RUNX1 NM_001754.4:c.601C>T p.Arg201Ter          | 40.7    |
|      | –                                                                    | –       | NRAS NM_002524.4:c.38G>A p.Gly13Asp             | 33.1    |
|      | –                                                                    | –       | NRAS NM_002524.4:c.35G>T p.Gly12Val             | 2.35    |
|      | –                                                                    | –       | NRAS NM_002524.4:c.35G>A p.Gly12Asp             | 13.19   |
| 8    | DNMT3A NM_175629.2:c.2645G>A p.Arg882His                             | 32.3    | DNMT3A NM_022552.4:c.2645G>A p.Arg882His        | 15.55   |
|      | IDH1 NM_005896.2:c.394C>T p.Arg132Cys                                | 30.8    | IDH1 NM_005896.2:c.394C>T p.Arg132Cys           | 18.97   |
| 9    | –                                                                    | –       | NRAS NM_002524.4:c.35G>A p.Gly12Asp             | 16.0    |
| 10   | WT1 NM_024426.4:c.1050C>A p.Cys350Ter                                | 51.3    | WT1 NM_024426.4:c.1050C>A p.Cys350Ter           | 50.34   |
| 12   | –                                                                    | –       | WT1 NM_024426.4:c.1133_1142dupTTGTACGGTC        | 39.92   |
| 14   | DNMT3A NM_175629.2:c.2644C>T p.Arg882His                             | 47.6    | DNMT3A NM_022552.4:c.2644C>T p.Arg882His        | 45.3    |
|      | NPM1 NM_002520.6:c.860_863dupTCTG p.Trp288fs                         | 35.1    | NPM1 NM_002520.6:c.860_863dupTCTG<br>p.Trp288fs | 48.9    |
|      | FLT3 NM_004119.2:c.2503G>T p.Asp835Tyr                               | 13.6    | FLT3 NM_004119.2:c.2503G>T p.Asp835Tyr          | 11.1    |
| 15   | WT1 NM_024426.4:c.1129_1135delACTCTTG<br>p.Thr377fs                  | 33.7    | –                                               | –       |
| 16   | –                                                                    | –       | NRAS NM_002524.4:c.35G>C p.Gly12Ala             | 26.07   |
| 17   | NPM1 NM_002520.6:c.860_863dupTCTG p.Trp288fs                         | 29.2    | NPM1 NM_002520.6:c.860_863dupTCTG<br>p.Trp288fs | 40.7    |
| 18   | IDH1 NM_005896.2:c.603_606delGTCT p.Ser202fs                         | 44.7    | IDH1 NM_005896.2:c.603_606delGTCT p.Ser202fs    | 49.9    |

|    |                                                                                |       |                                                     |       |
|----|--------------------------------------------------------------------------------|-------|-----------------------------------------------------|-------|
|    | –                                                                              | –     | <i>TP53</i> NM_000546.5:c.830G>A p.Cys277Tyr        | 4.4   |
| 19 | <i>NRAS</i> NM_002524.4:c.35G>A p.Gly12Asp                                     | 12.67 | <i>NRAS</i> NM_002524.4:c.35G>A p.Gly12Asp          | 8.1   |
|    | –                                                                              | –     | <i>KRAS</i> NM_004985.3:c.35G>A p.Gly12Asp          | 2.0   |
|    | –                                                                              | –     | <i>FLT3</i> NM_004119.2:c.2503G>T p.Asp835Tyr       | 2.8   |
|    | –                                                                              | –     | <i>FLT3</i> NM_004119.2:c.2505T>A p.Asp835Glu       | 5.4   |
| 20 | <i>IDH2</i> NM_002168.2:c.419G>A p.Arg140Gln                                   | 9.7   | <i>IDH2</i> NM_002168.2:c.419G>A p.Arg140Gln        | 45.22 |
|    | –                                                                              | –     | <i>NPM1</i> NM_002520.6:c.863_864insCCTG p.Trp288fs | 36.0  |
| 21 | –                                                                              | –     | <i>KIT</i> NM_000222.2:c.2466T>G p.Asn822Lys        | 6.6   |
| 22 | <i>BRAF</i> NM_004333.4:c.1799T>A p.Val600Glu                                  | 9.83  | –                                                   | –     |
|    | <i>EGFR</i> NM_005228.3:c.2155G>A p.Gly719Ser                                  | 2.7   | –                                                   | –     |
|    | <i>EGFR</i><br>NM_005228.3:c.2235_2249delGGAATTAAGAGAAGC<br>p.Glu746_Ala750del | 2.88  | –                                                   | –     |
|    | –                                                                              | –     | <i>IDH2</i> NM_002168.2:c.515G>A p.Arg172Lys        | 22.1  |
|    | –                                                                              | –     | <i>MPL</i> NM_005373.2:c.1774C>T p.Arg592Ter        | 6.6   |

\*Patients 4, 6, 11 and 13 did not have any somatic mutations detected at baseline by either assay, among the overlapping 28 genes of interest

UPN: unique patient number, ccfDNA: circulating cell-free DNA, VAF: variant allelic frequency

**Supplemental Figure 1.** Detected VAF of homozygous SNPs in mixing studies as detected using ccfDNA.

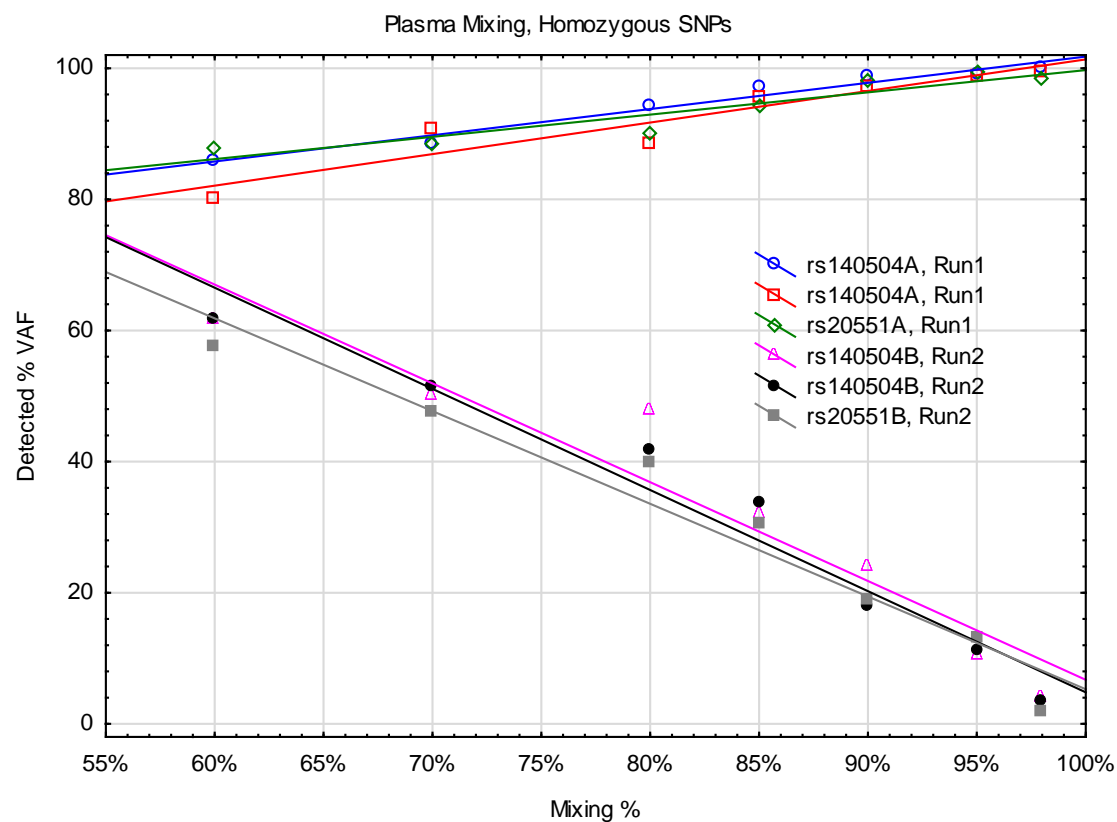

Dilution studies were performed to assess the reliability of the ccfDNA assay at various VAFs. We mixed volume-to-volume blood samples from two normal individuals harboring benign homozygous SNPs. Our goal was to monitor the relative changes in the detected VAF from one dilution to the next. Results from 2 runs of homozygous SNP mixing studies of individual A and individual B are shown. Overall, the results demonstrate linearity and reproducibility of the assay across dilutions.
